# Supplementary material
Source: PubMed Central journal article supplement (PMC8282120)
Supplement: ciab319_suppl_supplemental_tables.pdf [file ciab319_suppl_supplemental_tables.pdf]

Supplementary Table 1. Classification of high-risk underlying medical conditions that increase risk for severe illness from COVID-19.

| <b>Medical Condition</b>                      |                                                                                                                                                                     |
|-----------------------------------------------|---------------------------------------------------------------------------------------------------------------------------------------------------------------------|
| Cancer                                        | Active solid organ cancer with or without metastases; active cancer defined as treatment for the cancer or newly diagnosed cancer in the past 6 months              |
|                                               | Active hematologic cancer (such as leukemia/ lymphoma/ myeloma) or active cancer defined as treatment for the cancer or newly diagnosed cancer in the past 6 months |
| Chronic kidney disease                        | Chronic kidney disease without chronic renal replacement therapy                                                                                                    |
|                                               | End stage renal disease on chronic renal replacement therapy (including hemodialysis or peritoneal dialysis)                                                        |
|                                               | Prior kidney transplant                                                                                                                                             |
| Chronic obstructive pulmonary disease         |                                                                                                                                                                     |
| Heart disease                                 | Moderately or severely symptomatic heart failure                                                                                                                    |
|                                               | Peripheral vascular disease that limits mobility                                                                                                                    |
|                                               | Prior myocardial infarction                                                                                                                                         |
|                                               | Cardiac arrhythmias including atrial fibrillation and ventricular arrhythmias                                                                                       |
|                                               | Valvular heart disease                                                                                                                                              |
| Immunocompromised from solid organ transplant |                                                                                                                                                                     |

|                     |                                                                                              |
|---------------------|----------------------------------------------------------------------------------------------|
| Obesity             | Calculated body mass index $\geq 30$ kg/m <sup>2</sup>                                       |
| Sickle cell disease |                                                                                              |
| Diabetes mellitus   | Diabetes mellitus with or without end organ damage (type of diabetes mellitus not specified) |
| Pregnancy           | Pregnant at the time of admission                                                            |
| Smoking             | Current smoker or quit <6 months prior to admission                                          |

379 Supplementary Table 2. Outcomes among hospitalized adults testing positive for SARS-COV-2  
 380 by Advisory Committee on Immunization Practices (ACIP) criteria for increased risk for severe  
 381 COVID-19— 14 Academic Medical Centers, United States, March-June and October-December  
 382 2020.

| Priority group†                                                                     | No. (%)    |            |             | p-value‡        |
|-------------------------------------------------------------------------------------|------------|------------|-------------|-----------------|
|                                                                                     | Total      | March-June | Oct-Dec     |                 |
| <b>Overall</b>                                                                      | n=647      | n=434      | n=213       |                 |
| Any severe outcome±                                                                 | 273 (44)   | 166 (41)   | 107 (51)    | <b>0.015</b>    |
| NIV                                                                                 | 134 (22)   | 53 (13)    | 81 (39)     | <b>&lt;.001</b> |
| IMV                                                                                 | 138 (22)   | 88 (22)    | 50 (24)     | 0.56            |
| Vasopressors                                                                        | 119 (19)   | 84 (21)    | 35 (17)     | 0.20            |
| Death                                                                               | 117 (18)   | 77 (18)    | 40 (19)     | 0.75            |
| <b>Did not meet ACIP criteria for<br/>increased risk for severe COVID-<br/>19**</b> | 56/618 (9) | 35/409 (9) | 21/209 (10) | 0.41            |
| Any severe outcome                                                                  | 13 (24)    | 8 (24)     | 5 (25)      | 1.00            |
| NIV                                                                                 | 5 (9)      | 1 (3)      | 4 (20)      | 0.053           |
| IMV                                                                                 | 8 (14)     | 6 (17)     | 2 (10)      | 0.70            |
| Vasopressors                                                                        | 7 (13)     | 6 (17)     | 1 (5)       | 0.24            |
| Death                                                                               | 4 (7)      | 3 (9)      | 1 (5)       | 1.00            |

| <b>Met at least one ACIP criteria for</b> | 562/618 (91) | 374/409 (91) | 188/209 (90) | 0.54            |
|-------------------------------------------|--------------|--------------|--------------|-----------------|
| <b>increased risk for severe COVID-</b>   |              |              |              |                 |
| <b>19</b>                                 |              |              |              |                 |
| Any severe outcome                        | 252 (47)     | 152 (43)     | 100 (54)     | <b>0.021</b>    |
| NIV                                       | 126 (24)     | 51 (15)      | 75 (41)      | <b>&lt;.001</b> |
| IMV                                       | 124 (23)     | 78 (22)      | 46 (25)      | 0.59            |
| Vasopressors                              | 108 (20)     | 75 (22)      | 33 (18)      | 0.27            |
| Death                                     | 111 (20)     | 72 (19)      | 39 (21)      | 0.65            |
| <b>Long-term care facilities</b>          | 117/628 (19) | 105/424 (25) | 12/204 (6)   | <b>&lt;.001</b> |
| Any severe outcome                        | 60 (55)      | 51 (53)      | 9 (75)       | 0.14            |
| NIV                                       | 21 (20)      | 14 (15)      | 7 (58)       | <b>&lt;.001</b> |
| IMV                                       | 17 (16)      | 14 (15)      | 3 (25)       | 0.36            |
| Vasopressors                              | 20 (19)      | 17 (18)      | 3 (25)       | 0.55            |
| Death                                     | 32 (27)      | 27 (26)      | 5 (42)       | 0.24            |
| <b>≥75 years</b>                          | 140/642 (22) | 99/429 (23)  | 41/213 (19)  | 0.27            |
| Any severe outcome                        | 82 (60)      | 56 (58)      | 26 (63)      | 0.58            |
| NIV                                       | 33 (25)      | 16 (18)      | 17 (41)      | <b>0.003</b>    |
| IMV                                       | 28 (21)      | 18 (19)      | 10 (24)      | 0.51            |
| Vasopressors                              | 27 (20)      | 20 (22)      | 7 (17)       | 0.54            |
| Death                                     | 49 (35)      | 33 (33)      | 16 (39)      | 0.52            |
| <b>65-74 years</b>                        | 147/642 (23) | 89/429 (21)  | 58/213 (27)  | 0.07            |
| Any severe outcome                        | 69 (49)      | 34 (40)      | 35 (63)      | <b>0.011</b>    |

|                               |              |              |              |       |
|-------------------------------|--------------|--------------|--------------|-------|
| NIV                           | 36 (27)      | 11 (14)      | 25 (45)      | <.001 |
| IMV                           | 39 (28)      | 22 (27)      | 17 (31)      | 0.60  |
| Vasopressors                  | 34 (24)      | 20 (24)      | 14 (25)      | 0.93  |
| Death                         | 33 (22)      | 17 (19)      | 16 (28)      | 0.23  |
| <b>High-risk conditions**</b> | 501/600 (84) | 332/394 (84) | 169/206 (82) | 0.49  |
| Any severe outcome            | 227 (47)     | 138 (44)     | 89 (53)      | 0.058 |
| NMV                           | 114 (24)     | 45 (15)      | 69 (41)      | <.001 |
| IMV                           | 114 (24)     | 71 (23)      | 43 (26)      | 0.50  |
| Vasopressors                  | 96 (20)      | 66 (22)      | 30 (18)      | 0.35  |
| Death                         | 93 (19)      | 60 (18)      | 33 (19)      | 0.71  |

---

Abbreviations: NIV = non-invasive ventilation; IMV = invasive mechanical ventilation.

† Some severity subgroups were missing data (from 4% to 6%): any severe outcome (March-June: 26, October-December: 3), non-invasive ventilation (March-June: 34, October-December: 4), invasive mechanical ventilation (March-June: 29, October-December: 3), and vasopressors (March-June: 32, October-December: 2). Denominators used to calculate proportions of respondents with select outcomes in the specified group excluded patients who had missing data.

‡ Chi-squared or Fisher's exact test were used for statistical testing of categorical variables.

± Any severe outcome was defined as: non-invasive ventilation, invasive mechanical ventilation, vasopressor support, dialysis/renal replacement therapy, extracorporeal membrane oxygenation, stroke, venous thromboembolic event, or death.

\*\* ACIP criteria for increased risk for severe COVID-19 includes long-term care facility residents, persons aged  $\geq 65$  years, and persons aged 16-64 years with high-risk medical

conditions associated with increased risk for severe COVID-19 defined by CDC (cancer; chronic kidney disease; chronic obstructive pulmonary disease; heart conditions [e.g., heart failure, coronary artery disease, or cardiomyopathies]; immunocompromised state from solid organ transplant; obesity; sickle cell disease; smoking; diabetes mellitus; and pregnancy) [1].

Supplementary Table 3. Distribution of patients by site and by time period.

| Site                                        | No. (%)        |                     |                  |
|---------------------------------------------|----------------|---------------------|------------------|
|                                             | Total<br>N=647 | March-June<br>N=434 | Oct-Dec<br>N=213 |
| Baystate Medical Center                     | 48 (7)         | 16 (4)              | 31 (15)          |
| Beth Israel Deaconess Medical Center        | 74 (11)        | 74 (17)             | 0 (0)            |
| UCHealth University of Colorado<br>Hospital | 41 (6)         | 19 (4)              | 22 (10)          |
| Hennepin County Medical Center              | 51 (8)         | 40 (9)              | 10 (5)           |
| Intermountain Medical Center                | 20 (3)         | 20 (5)              | 0 (0)            |
| Montefiore Medical Center                   | 118 (18)       | 113 (26)            | 5 (2)            |
| Oregon Health & Sciences University         | 18 (3)         | 9 (2)               | 10 (5)           |
| The Ohio State University                   | 34 (5)         | 28 (6)              | 5 (2)            |
| Wake Forest University                      | 50 (8)         | 15 (3)              | 35 (16)          |
| Vanderbilt University Medical Center        | 109 (17)       | 20 (5)              | 93 (44)          |
| Johns Hopkins University                    | 18 (3)         | 16 (4)              | 2 (1)            |
| Stanford University                         | 7 (1)          | 7 (2)               | 0 (0)            |
| University of California Los Angeles        | 32 (5)         | 31 (7)              | 0 (0)            |
| University of Washington                    | 27 (4)         | 26 (6)              | 0 (0)            |
